# Supplementary material for: The regulation of arbuscular mycorrhizal symbiosis by phosphate in pea involves early and systemic signalling events
Source: PubMed Central journal article supplement — J Exp Bot. 2010 Nov 2;62(3):1049–60. doi: 10.1093/jxb/erq335 (PMC3022399; doi:10.1093/jxb/erq335), 2010-11-02
Supplement: supp_erq335_00052001-file001.pdf [file supp_erq335_00052001-file001.pdf]

The regulation of arbuscular mycorrhizal symbiosis by phosphate in pea involves early and systemic signalling events

Coline Balzergue, Virginie Puech-Pagès, Guillaume Bécard & Soizic F. Rochange

**Table S1. Effect of phosphate fertilization on shoot and root fresh weight.**

Plants inoculated with spores of *Gl. intraradices* were grown under Low P (7.5  $\mu$ M), Medium P (75  $\mu$ M), or High P (750  $\mu$ M) conditions. Following plant harvest, root and shoot fresh weights were determined. n=5-6 plants for each condition. Different letters indicate statistically significant differences according to one-way ANOVA followed by Tukey's test ( $p < 0.05$ ).

|                 | <b>Shoots</b>   |    | <b>Roots</b>   |    |
|-----------------|-----------------|----|----------------|----|
| <b>Low P</b>    | 9.82 +/- 0.97   | a  | 11.58 +/- 1.28 | a  |
| <b>Medium P</b> | 14.27 +/- 2.16  | ab | 20.80 +/- 2.94 | ab |
| <b>High P</b>   | 39.72 +/- 14.21 | b  | 25.18 +/- 8.43 | b  |

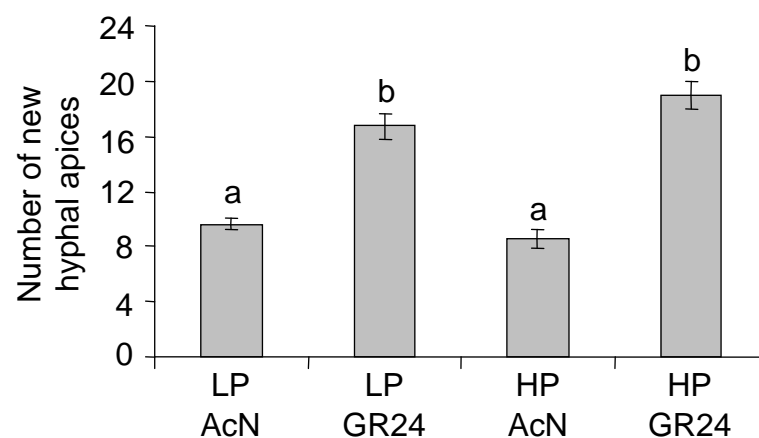

**Figure S1. Effect of phosphate concentration on *Gi. rosea* hyphal branching responsiveness to GR24.**

Spores of *Gi. rosea* germinated on Low P or High P medium were treated with 100 nM GR24 or with the solvent alone as negative control (10% acetonitrile, AcN). Newly formed hyphal apices were counted 48h after treatment. Error bars show s.e.m., n=38-56 treated spores for each condition. Different letters indicate statistically significant differences according to Kruskal-Wallis test ( $p < 0.05$ ).
